# Supplementary material
Source: PubMed Central journal article supplement (PMC3245541)
Supplement: supp_msr207_Supplementary_figure1.pdf [file supp_msr207_Supplementary_figure1.pdf]

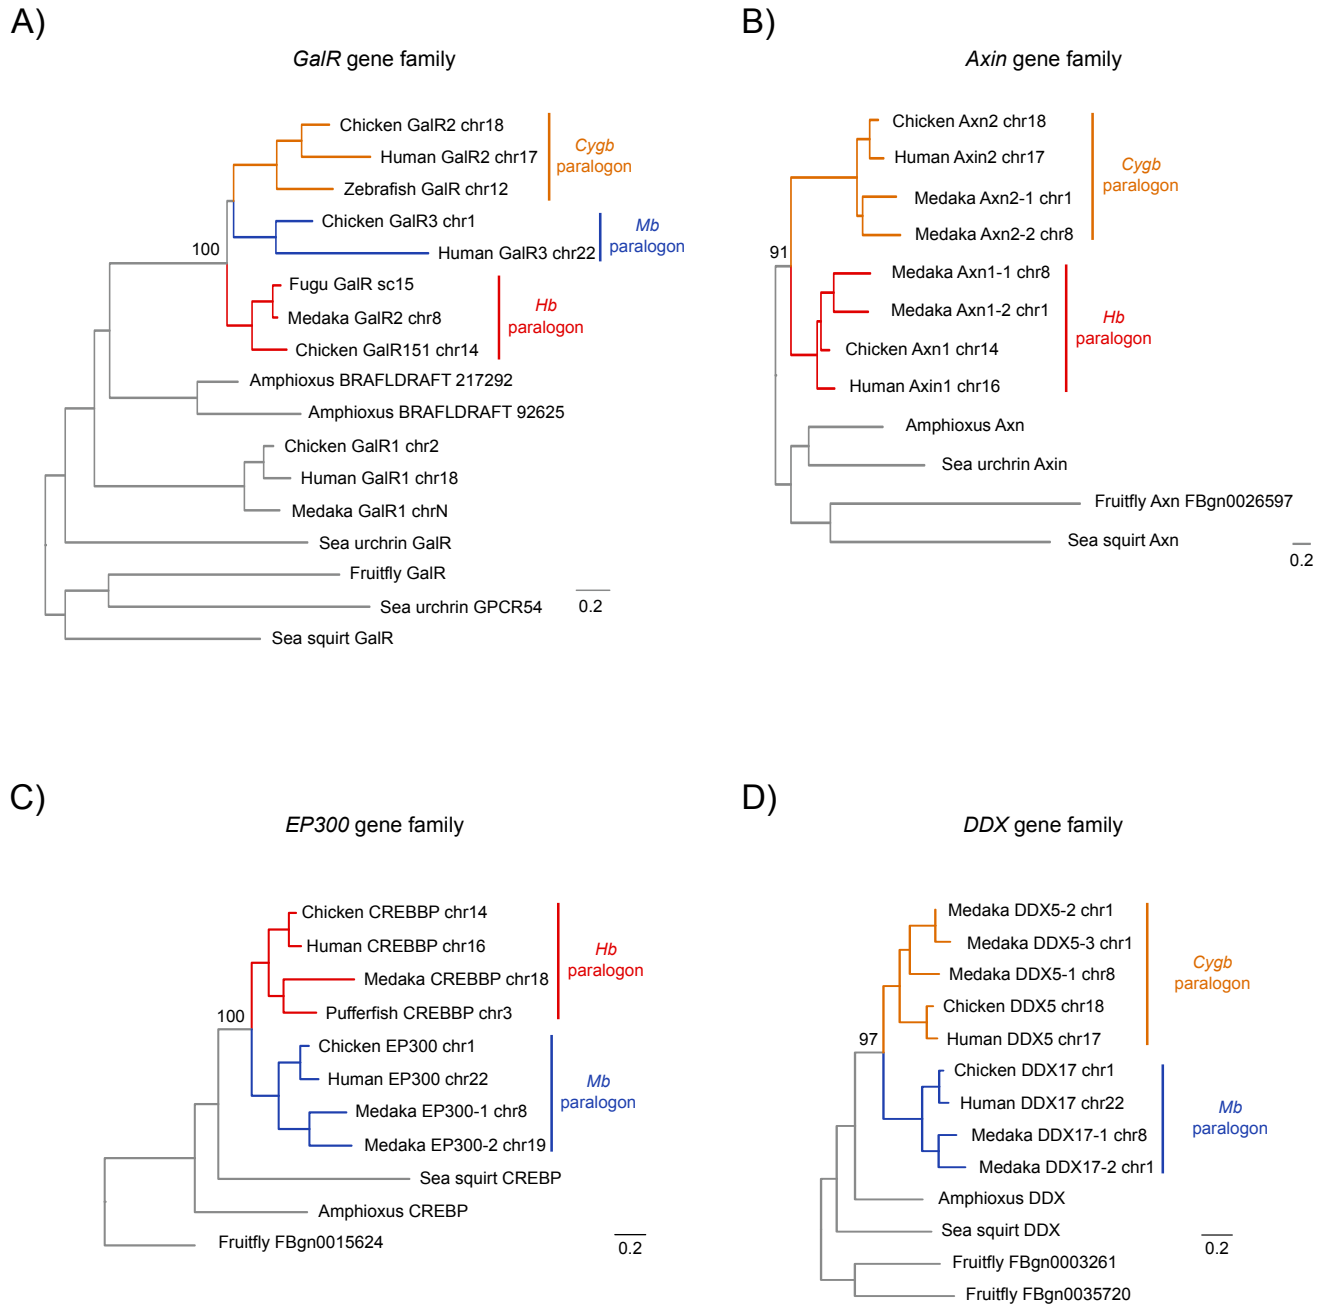

**Supplementary figure 1.** Maximum likelihood phylogenies of vertebrate gene families that unite the three globin-defined paralogs in various combinations. In each case the gene families diversified prior to the divergence of tetrapods and teleost fish. (A) Phylogeny showing one of 25 examples of a 3:1 gene family that unites the *Cygb*, *Mb*, and *Hb* paralogs. (B-D) Phylogenies showing 3 examples of 2:1 gene families that unite the *Cygb*, *Mb*, and *Hb* paralogs in various pairwise combinations. Numbers above the nodes correspond to maximum likelihood bootstrap support values.
