# Supplementary material
Source: PubMed Central journal article supplement (PMC3245541)
Supplement: supp_msr207_Supplementary_figure2.pdf [file supp_msr207_Supplementary_figure2.pdf]

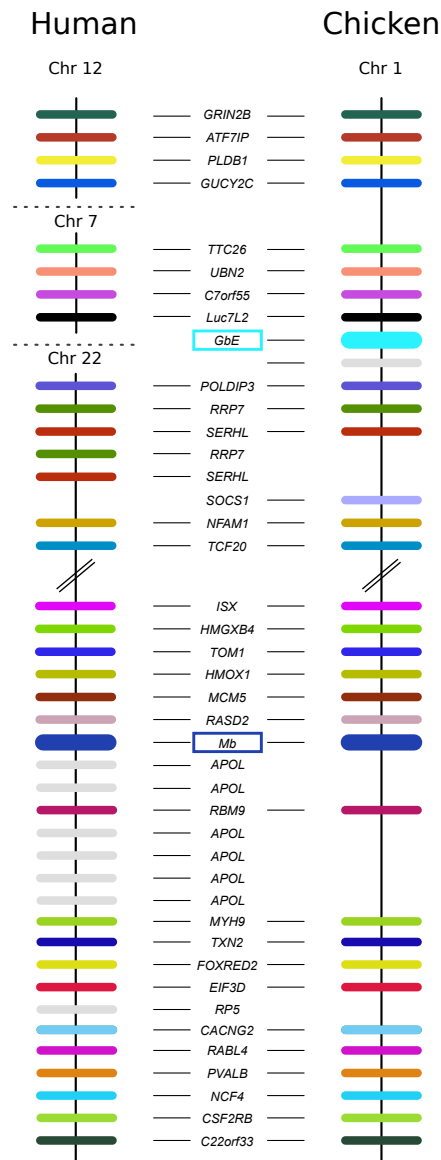

**Supplementary figure 2.** Conserved synteny of chicken and human *Mb* paralogs. In chicken, the *Mb* paralogon spans a single contiguous segment of chromosome 1, whereas the human *Mb* paralogon is distributed among chromosomes 7, 12, and 22 due to a history of mammal-specific translocations. The human and chicken *Mb* orthologs and the bird-specific *GbE* gene are shown in boxes.
