# Supplementary material
Source: PubMed Central journal article supplement (PMC3245541)
Supplement: supp_msr207_Supplementary_figure3.pdf [file supp_msr207_Supplementary_figure3.pdf]

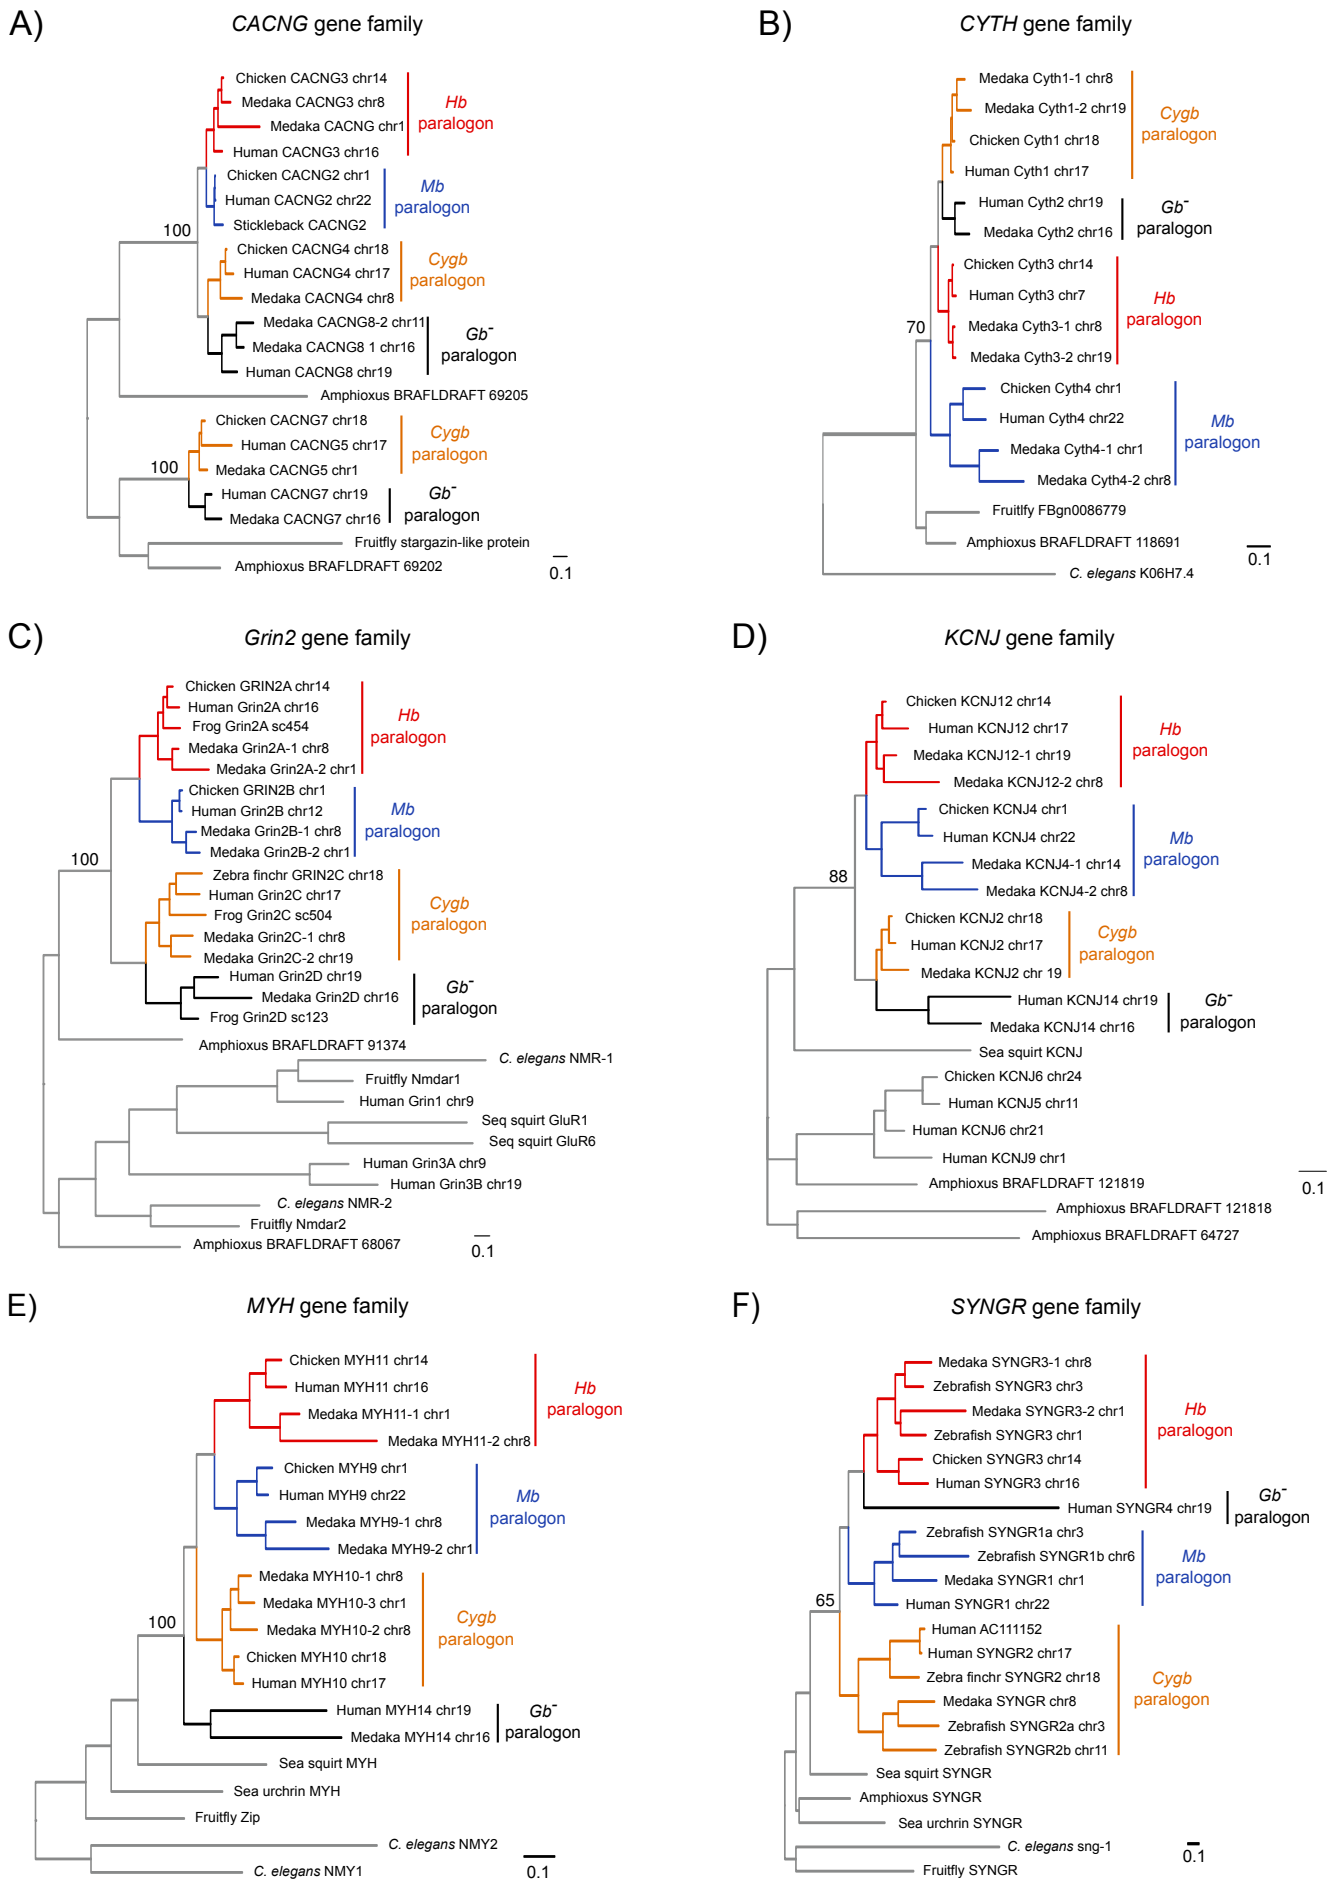

**Supplementary figure 3.** Maximum likelihood phylogenies of six vertebrate gene families that unite the three globin-defined paralogs with the *Gb<sup>-</sup>* paralogon, located on human chromosome 19. In each case the gene families diversified prior to the divergence of tetrapods and teleost fish. Numbers above the nodes correspond to maximum likelihood bootstrap support values.
