# Supplementary material
Source: PubMed Central journal article supplement (PMC3245541)
Supplement: supp_msr207_Supplementary_Table1.pdf [file supp_msr207_Supplementary_Table1.pdf]

**Supplementary table 1.** Globin sequences used in this study, along with the corresponding accession numbers.

| Sequence Name       | Species                       | Taxonomic Group    | Accession number    | Source  |
|---------------------|-------------------------------|--------------------|---------------------|---------|
| Amphioxus Gb1       | <i>Branchiostoma floridae</i> | Cephalochordate    | XP_002589215        | GenBank |
| Amphioxus Gb2       | <i>Branchiostoma floridae</i> | Cephalochordate    | XP_002596037        | GenBank |
| Amphioxus Gb3       | <i>Branchiostoma floridae</i> | Cephalochordate    | XP_002598546        | GenBank |
| Amphioxus Gb4       | <i>Branchiostoma floridae</i> | Cephalochordate    | XP_002601010        | GenBank |
| Amphioxus Gb5       | <i>Branchiostoma floridae</i> | Cephalochordate    | XP_002601012        | GenBank |
| Amphioxus Gb6       | <i>Branchiostoma floridae</i> | Cephalochordate    | XP_002605405        | GenBank |
| Amphioxus Gb7       | <i>Branchiostoma floridae</i> | Cephalochordate    | XP_002605450        | GenBank |
| Amphioxus Gb8       | <i>Branchiostoma floridae</i> | Cephalochordate    | XP_002608200        | GenBank |
| Amphioxus Gb9       | <i>Branchiostoma floridae</i> | Cephalochordate    | XP_002608525        | GenBank |
| Amphioxus Gb10      | <i>Branchiostoma floridae</i> | Cephalochordate    | XP_002608548        | GenBank |
| Amphioxus Gb11      | <i>Branchiostoma floridae</i> | Cephalochordate    | XP_002608549        | GenBank |
| Amphioxus Gb12      | <i>Branchiostoma floridae</i> | Cephalochordate    | XP_002610016        | GenBank |
| Amphioxus Gb13      | <i>Branchiostoma floridae</i> | Cephalochordate    | XP_002610160        | GenBank |
| Amphioxus Gb14      | <i>Branchiostoma floridae</i> | Cephalochordate    | XP_002610875        | GenBank |
| Anole lizard Cygb   | <i>Anolis carolinensis</i>    | Tetrapod           | ENSACAG00000008394* | Ensembl |
| Anole lizard GbY    | <i>Anolis carolinensis</i>    | Tetrapod           | AAWZ01045931*       | Ensembl |
| Anole lizard Hba    | <i>Anolis carolinensis</i>    | Tetrapod           | ENSACAG00000016421  | Ensembl |
| Anole lizard Hbb    | <i>Anolis carolinensis</i>    | Tetrapod           | ENSACAG00000012173  | Ensembl |
| Anole lizard Mb     | <i>Anolis carolinensis</i>    | Tetrapod           | ENSACAG00000016595  | Ensembl |
| Chicken Cygb        | <i>Gallus gallus</i>          | Tetrapod           | NM_001008789        | GenBank |
| Chicken GbE         | <i>Gallus gallus</i>          | Tetrapod           | NM_001008786        | GenBank |
| Chicken Hba         | <i>Gallus gallus</i>          | Tetrapod           | NM_001004376        | GenBank |
| Chicken Hbb         | <i>Gallus gallus</i>          | Tetrapod           | NM_001081704        | GenBank |
| Chicken Mb          | <i>Gallus gallus</i>          | Tetrapod           | XM_416292           | GenBank |
| Frog Cygb           | <i>Xenopus tropicalis</i>     | Tetrapod           | NM_001006869        | GenBank |
| Frog GbX            | <i>Xenopus tropicalis</i>     | Tetrapod           | NP_001011196        | GenBank |
| Frog GbY            | <i>Xenopus tropicalis</i>     | Tetrapod           | BC158411            | GenBank |
| Frog Hba            | <i>Xenopus tropicalis</i>     | Tetrapod           | NM_203529           | GenBank |
| Frog Hbb            | <i>Xenopus tropicalis</i>     | Tetrapod           | NM_203528           | GenBank |
| Frog Ngb            | <i>Xenopus tropicalis</i>     | Tetrapod           | ENSXETG00000027106  | Ensembl |
| Hagfish Hb1         | <i>Myxine glutinosa</i>       | Cyclostome         | AF156936            | GenBank |
| Hagfish Hb2         | <i>Myxine glutinosa</i>       | Cyclostome         | AF157494            | GenBank |
| Hagfish Hb3         | <i>Myxine glutinosa</i>       | Cyclostome         | AF184047            | GenBank |
| Hagfish Hb4         | <i>Myxine glutinosa</i>       | Cyclostome         | AF184239            | GenBank |
| Houndshark Hba      | <i>Mustelus griseus</i>       | Cartilaginous fish | BAA75399            | GenBank |
| Houndshark Hbb      | <i>Mustelus griseus</i>       | Cartilaginous fish | BAA75400            | GenBank |
| Houndshark Mb       | <i>Mustelus griseus</i>       | Cartilaginous fish | P14399              | GenBank |
| Human Cygb          | <i>Homo sapiens</i>           | Tetrapod           | NM_134268           | GenBank |
| Human Hba           | <i>Homo sapiens</i>           | Tetrapod           | NM_000558           | GenBank |
| Human Hbb           | <i>Homo sapiens</i>           | Tetrapod           | NM_000518           | GenBank |
| Human Mb            | <i>Homo sapiens</i>           | Tetrapod           | NG_007075           | GenBank |
| Human Ngb           | <i>Homo sapiens</i>           | Tetrapod           | NP_067080           | GenBank |
| Arctic lamprey Hb 1 | <i>Lethenteron japonicum</i>  | Cyclostome         | AB294235            | GenBank |
| Arctic lamprey Hb 2 | <i>Lethenteron japonicum</i>  | Cyclostome         | AB294236            | GenBank |

| Sequence Name         | Species                            | Taxonomic Group    | Accession number    | Source  |
|-----------------------|------------------------------------|--------------------|---------------------|---------|
| Arctic lamprey Hb 4   | <i>Lethenteron japonicum</i>       | Cyclostome         | AB294237            | GenBank |
| Medaka Cygb-1         | <i>Oryzias latipes</i>             | Teleost fish       | NM_001104767        | GenBank |
| Medaka Cygb-2         | <i>Oryzias latipes</i>             | Teleost fish       | NM_001104768        | GenBank |
| Medaka GbX            | <i>Oryzias latipes</i>             | Teleost fish       | ENSORLGG00000017054 | Ensembl |
| Medaka Hba            | <i>Oryzias latipes</i>             | Teleost fish       | ENSORLGG00000005267 | Ensembl |
| Medaka Hbb            | <i>Oryzias latipes</i>             | Teleost fish       | ENSORLGG00000003020 | Ensembl |
| Medaka Mb             | <i>Oryzias latipes</i>             | Teleost fish       | ENSORLGG00000004130 | Ensembl |
| Medaka Ngb            | <i>Oryzias latipes</i>             | Teleost fish       | ENSORLT00000020359  | Ensembl |
| Platypus GbY          | <i>Ornithorhynchus anatinus</i>    | Tetrapod           | AC203513*           | GenBank |
| Platypus Hba          | <i>Ornithorhynchus anatinus</i>    | Tetrapod           | AC203513*           | GenBank |
| Platypus Hbb          | <i>Ornithorhynchus anatinus</i>    | Tetrapod           | AC190020*           | GenBank |
| Platypus Hbw          | <i>Ornithorhynchus anatinus</i>    | Tetrapod           | AC203513*           | GenBank |
| Platypus Mb           | <i>Ornithorhynchus anatinus</i>    | Tetrapod           | XM_001513063        | GenBank |
| Platypus Ngb          | <i>Ornithorhynchus anatinus</i>    | Tetrapod           | XP_001508417        | GenBank |
| Port Jackson shark Mb | <i>Heterodontus portusjacksoni</i> | Cartilaginous fish | P02206              | GenBank |
| Pufferfish Cygb-1     | <i>Tetraodon nigroviridis</i>      | Teleost fish       | AJ635230            | GenBank |
| Pufferfish Cygb-2     | <i>Tetraodon nigroviridis</i>      | Teleost fish       | AJ635231            | GenBank |
| Pufferfish GbX        | <i>Tetraodon nigroviridis</i>      | Teleost fish       | CAG25725            | GenBank |
| Pufferfish Hba        | <i>Tetraodon nigroviridis</i>      | Teleost fish       | ENSTNIG00000018576  | Ensembl |
| Pufferfish Hbb        | <i>Tetraodon nigroviridis</i>      | Teleost fish       | ENSTNIG00000012913  | Ensembl |
| Pufferfish Mb         | <i>Tetraodon nigroviridis</i>      | Teleost fish       | ENSTNIG00000005518  | Ensembl |
| Pufferfish Ngb        | <i>Tetraodon nigroviridis</i>      | Teleost fish       | CAC59974            | GenBank |
| Sea lamprey Hb PMII   | <i>Petromyzon marinus</i>          | Cyclostome         | AF248645            | GenBank |
| Sea lamprey Hb1a      | <i>Petromyzon marinus</i>          | Cyclostome         | P09967              | GenBank |
| Sea lamprey Hb1b      | <i>Petromyzon marinus</i>          | Cyclostome         | P21197              | GenBank |
| Sea lamprey Hb2       | <i>Petromyzon marinus</i>          | Cyclostome         | Q9I9I3              | GenBank |
| Sea lamprey Hb3       | <i>Petromyzon marinus</i>          | Cyclostome         | P09968              | GenBank |
| Sea lamprey Hb5       | <i>Petromyzon marinus</i>          | Cyclostome         | P02208              | GenBank |
| Sea squirt Glb1       | <i>Ciona intestinalis</i>          | Urochordate        | CAD68145            | GenBank |
| Sea squirt Glb2       | <i>Ciona intestinalis</i>          | Urochordate        | CAD68146            | GenBank |
| Sea squirt Glb3       | <i>Ciona intestinalis</i>          | Urochordate        | CAD68147            | GenBank |
| Sea squirt Glb4       | <i>Ciona intestinalis</i>          | Urochordate        | CAD89600            | GenBank |
| Stingray Hba          | <i>Dasyatis akajei</i>             | Cartilaginous fish | BAA75249            | GenBank |
| Stingray Hbb          | <i>Dasyatis akajei</i>             | Cartilaginous fish | BAA75250            | GenBank |
| Zebra finch Cygb      | <i>Taeniopygia guttata</i>         | Tetrapod           | XM_002195407        | GenBank |
| Zebra finch GbE       | <i>Taeniopygia guttata</i>         | Tetrapod           | XM_002196350        | GenBank |
| Zebra finch Hba       | <i>Taeniopygia guttata</i>         | Tetrapod           | XM_002196096        | GenBank |
| Zebra finch Hbb       | <i>Taeniopygia guttata</i>         | Tetrapod           | XM_002190485        | GenBank |
| Zebra finch Mb        | <i>Taeniopygia guttata</i>         | Tetrapod           | XM_002199380        | GenBank |
| Zebrafish Cygb1       | <i>Danio rerio</i>                 | Teleost fish       | NM_152952           | GenBank |
| Zebrafish Cygb2       | <i>Danio rerio</i>                 | Teleost fish       | NM_001024224        | GenBank |
| Zebrafish GbX         | <i>Danio rerio</i>                 | Teleost fish       | CAG25723            | GenBank |
| Zebrafish Hba         | <i>Danio rerio</i>                 | Teleost fish       | NM_131257           | GenBank |
| Zebrafish Hbb         | <i>Danio rerio</i>                 | Teleost fish       | NM_131020           | GenBank |
| Zebrafish Mb          | <i>Danio rerio</i>                 | Teleost fish       | NM_200586           | GenBank |
| Zebrafish Ngb         | <i>Danio rerio</i>                 | Teleost fish       | NP_571928           | GenBank |

\* These sequences were re-annotated manually.
